# Supplementary material
Source: Research Square preprint supplement (doi:10.21203/rs.3.rs-9589530/v1)
Supplement: Supplementary file 1 [file d712da4c0d7e46c0d6ed6877.docx]

## **Appendix I**

## **Research Instrument**

**Topic: Evaluation of the Utilisation and Quality of Information and Communications Technology (ICT) in Community Pharmacies in Enugu Metropolis**

Dear respondent,

I am a post-graduate student of the University of Nigeria and currently undertaking a research project for M.Pharm in the Department of Clinical Pharmacy and Pharmacy Management. I am conducting research to assess the extent of integration of Information and Communications Technology (ICT) in community pharmacies in Enugu Metropolis. Your response will be treated with utmost confidentiality.

**Section One: Demographic Information**

Gender: Male {  } Female {  }

Age: Less than 30 years {  }; 31 to 40 years {  }; 41 to 50 years {  }; 51 to 60 years {  }; 61 to 70 years {  }; 71 years and above {  }

Ethnicity: Igbo {  }; Hausa {  }; Yoruba {  }; Others {  }

Highest Level of Education: B.Pharm {  }; PharmD {  }; MSc {  }; M.Pharm{  }; PhD {  }; FPCPharm {  }

Location of Community Pharmacy: In a shopping mall {   }; Near a residential area (e.g., in a town, market) {  }; Near a hospital/clinic { }; Rural area { }; Others (please specify) ____________________________

Type of Community Pharmacy: Independent Retail Pharmacy {  }; Wholesale outlet {  }; Chain Retail Pharmacy {  }

Number of hours open: 8–12 hours {  }; >12 hours {  }

Number of staff members (including security): <5 {  }; 5–10 {  }; >10 {  }

Number of prescriptions filled per day: 50 or less {  }; >50 {  }

Number of patients seen per day: ≤50 {  }; 51–100 {  }; >100 {  }

Additional Health Services provided (tick as many as apply): Malaria parasite test {  }; Widal test {  }; Pregnancy Test {  }; Blood Pressure measurement {  }; Blood Glucose test {  }; Blood lipid test { }; Blood uric acid { }; Others, please specify________________________________________

**Section Two: Utilisation of Information Technology (ICT) in carrying out some activities in the Community Pharmacy**

This section would assess the various ICT tools currently being used in your pharmacy. Please tick all the option(s) that best fit.

1. Online advertisement medium (tick as many as apply):
2. WhatsApp: Yes {  }; No {  }
3. Facebook: Yes {  }; No {  }
4. Twitter: Yes {  }; No {  }
5. Instagram: Yes {  }; No {  }
6. None {  }
7. Others, please specify ………………………………………….
8. Electronic payment systems: Yes {  }; No {  }
9. Tablet or pill-counting machine: Yes {  }; No {  }
10. Barcode reading system for medicines/health products: Yes {  }; No {  }
11. Automated/unit-dose packaging machine: Yes {  }; No {  }
12. Labelling machine: Yes {  }; No {  }
13. Electronic patient record system: Yes {  }; No {  }

If Yes, state the type ……………………………………….………..

1. Means of communication with regular clients (tick as many as apply):
2. Phone: Yes {  }; No {  }
3. Email: Yes {  }; No {  }
4. WhatsApp: Yes {  }; No {  }
5. Text message: Yes {  }; No {  }
6. Facebook: Yes {  }; No {  }
7. Fax: Yes {  }; No {  }
8. Others, please specify: ………………………………
9. No communication {  }
10. Mobile or online apps for Pharmacy store: Yes {  }; No {  }
11. Receipt of patient information from different mobile health apps: Yes {  }; No {  }
12. Do you use website/software for drug information: Yes {  }; No {  }
13. If you answered yes to Q11, which of these websites/softwares do you consult as a source of drug information whether as e-copies or hard copies? (tick as many as apply):
14. Google search: Yes {  }; No {  }
15. Medscape: Yes {  }; No {  }
16. PubMed: Yes {  }; No {  }
17. Emdex: Yes {  }; No {  }
18. British National Formulary (BNF): Yes {  }; No {  }
19. Monthly Index of Medical Specialities (MIMs): Yes {  }; No {  }
20. Others, please specify_____________________________________

13. Use of common online business platforms to sell products/medicines: Yes {  }; No {  }

14. Software/programs used for sales in the Pharmacy:

1. QuickBooks Point of Sales: Yes {  }; No {  }
2. None {  }
3. Others, please specify _____________________________

15. What software/programs do you use to prevent theft in the Pharmacy?

Answer: __________________________________

If none, leave blank.

16. What software/programs do you use to prevent/track expiries in the Pharmacy?

Answer: _____________________________________

If none, leave blank.

17. What software/programs do you use for inventory management in the Pharmacy?

Answer: _____________________________________

If none, leave blank.

18. Which of these mass media tools do you use in your Pharmacy (tick as many as apply):

a. Television: Yes {  }; No {  }

b. Radio: Yes {  }; No {  }

c. Closed-Circuit Television (CCTV) camera: Yes {  }; No {  }

d. Laptop (without internet access): Yes {  }; No {  }

e. Laptop (with internet access): Yes {  }; No {  }

f. Others, please specify __________________________________

**Section Three: AVAILABILITY OF ICT SERVICES IN COMMUNITY PHARMACIES**

1. Not Available (NA) = planned but has not started or does not exist.
2. Insufficient (IS) = exists but is not comprehensive enough to achieve all the core elements required to perform the action.
3. Effective and Efficient (EE) = effectively and efficiently operational, complying with standard approaches.

**Appendix Table 1: ICT Services in Community Pharmacy**

|  | ICT SERVICES IN COMMUNITY PHARMACY | 1 | 2 | 3 |
| --- | --- | --- | --- | --- |
| 1. | Creation of clients’ medication account |  |  |  |
| 2. | Maintenance of active clients’ directory |  |  |  |
| 3. | Maintenance of data centre (databases) |  |  |  |
| 4. | Maintenance of clients’ call centre (follow-up means) |  |  |  |
| 5. | Maintenance of clients’ email addresses |  |  |  |
| 6. | Maintenance of functional internet websites |  |  |  |
| 7. | Interconnectivity with multiple branch offices |  |  |  |
| 8. | Maintenance of virtual meeting platforms |  |  |  |
| 9. | Maintenance of service desk for client satisfaction |  |  |  |
| 10. | Efficient storage service |  |  |  |

**Section Four: ICT Performance Quality Assessment**

This section seeks to determine the quality of ICT services utilised in your Pharmacy. Please use the response level below to answer the following questions:

**Appendix Table 2: Rating of ICT Performance Quality**

| Rating | PERFORMANCE DESCRIPTIONS |
| --- | --- |
| ME | Consistently Meets Expectations:  Consistently meets performance expectations and periodically may exceed them. Work is of good quality in all significant areas of responsibility. Skill level may be moderate in certain areas. Critical clinical goals are met. |
| NI | Needs Improvement to Fully Achieve Expectations:  Fails to meet expectations in one or more of the significant/essential position requirements. One or more critical clinical goals are not met. Improvement is needed. A plan to correct performance must be outlined and monitored and timelines established to improve performance. This rating calls for re-evaluation to see if performance improves. |
| FE | Fails to Achieve Expectations:  Does not meet goals and objectives. The majority of critical clinical goals are not met.  Improvement is needed in most aspects of the position. Corrective performance plans must be outlined and monitored and timelines for improvement established. This rating warrants re-evaluation to determine future employment status. |
| NA | Not Available:  ICT services is non-existence at the Pharmacy. |

Clinical Services: Dispensing, Medication reconciliation, Identification of drug therapy problems (DTPs), Pharmacovigilance reporting, Patients’ counselling, Medication Adherence, etc.

**Appendix Table 3: ICT Quality Attributes in Community Pharmacy**

|  | QUALITY ATTRIBUTES | NA | FE | NI | ME |
| --- | --- | --- | --- | --- | --- |
|  | ATTRIBUTE 1: RELIABILITY |  |  |  |  |
| 1. | Service was done within the timeframe |  |  |  |  |
| 2. | Service was done instantly |  |  |  |  |
| 3. | Service was carried out such as the user wanted |  |  |  |  |
| 4. | Service was done correctly and professionally |  |  |  |  |
| 5. | Service was done efficiently especially in critical period |  |  |  |  |
|  | ATTRIBUTE 2: ATTITUDES OF ICT STAFF |  |  |  |  |
| 6. | The guiding attitude of ICT Staff |  |  |  |  |
| 7. | Having a commitment from ICT Staff |  |  |  |  |
| 8. | Ready to give cooperation |  |  |  |  |
| 9. | Willing to help and friendly attitude |  |  |  |  |
|  | ATTRIBUTE 3: SKILLS AND PROFESSIONALISM OF ICT SERVICE STAFF |  |  |  |  |
| 10. | Have knowledge and technical skills |  |  |  |  |
| 11. | Have effective communication skills |  |  |  |  |
| 12. | Expert in problem-solving |  |  |  |  |
|  | ATTRIBUTE 4: ICT SERVICE MARKETING |  |  |  |  |
| 13. | Training of staff on existing ICT Service |  |  |  |  |
| 14. | Introduction of new ICT Service to clients and public |  |  |  |  |
|  | ATTRIBUTE 5: INFORMATION SUPPLY |  |  |  |  |
| 15. | Provide information on IT usage guidance |  |  |  |  |
| 16. | Provide the information which helps to enhance the ICT Service user knowledge |  |  |  |  |
| 17. | Provide the information which helps the ICT Service users on their daily ICT tasks |  |  |  |  |
| 18. | Provide information on services status |  |  |  |  |
|  | ATTRIBUTE 6: RESPONSIVE |  |  |  |  |
| 19. | Ensured the response was done instantly |  |  |  |  |
| 20. | Immediate action on ICT Service user request |  |  |  |  |
| 21. | Always have a staff who's ready to assist |  |  |  |  |
| 22. | Follow up the status of provided ICT Service |  |  |  |  |
|  | ATTRIBUTE 7: TECHNOLOGY USAGE |  |  |  |  |
| 23. | Makes use of information technology for providing the Services |  |  |  |  |
| 24. | Automation of relevant work processes |  |  |  |  |
| 25. | Stored ICT Service data electronically |  |  |  |  |
| 26. | Spread the ICT Service information online |  |  |  |  |
|  | ATTRIBUTE 8: PROACTIVE |  |  |  |  |
| 27. | Do not need many requests from the users to take an action |  |  |  |  |
| 28. | Think about what is the best for the customer |  |  |  |  |
| 29. | Provide ICT Service with value added to the customer |  |  |  |  |
| 30. | Better ICT Service beyond expectation |  |  |  |  |
|  | ATTRIBUTE 9: TRAINING FOR ICT SERVICE PROVIDER |  |  |  |  |
| 31. | Provide continuous training for the staff innovation |  |  |  |  |

NA = Not Available, FE = Fails to achieve Expectation, NI = Needs Improvement, ME = Meets Expectation

Thank you for your time.

## **Appendix II**

## **Reliability Test**

**Appendix Table 4: Results of Reliability Test for ICT Services**

| Items | Scale Variance if Item Deleted | Corrected Item–Total Correlation | Squared Multiple Correlation | Cronbach's Alpha if Item Deleted |
| --- | --- | --- | --- | --- |
| ICTS_in Comm_Pharm_Q1 | 20.111 | 0.726 | 0.666 | 0.887 |
| ICTS_in Comm_Pharm_Q2 | 19.694 | 0.749 | 0.757 | 0.885 |
| ICTS_in Comm_Pharm_Q3 | 19.608 | 0.679 | 0.637 | 0.890 |
| ICTS_in Comm_Pharm_Q4 | 21.251 | 0.499 | 0.548 | 0.902 |
| ICTS_in Comm_Pharm_Q5 | 21.473 | 0.622 | 0.623 | 0.894 |
| ICTS_in Comm_Pharm_Q6 | 21.321 | 0.576 | 0.690 | 0.896 |
| ICTS_in Comm_Pharm_Q7 | 20.065 | 0.764 | 0.864 | 0.884 |
| ICTS_in Comm_Pharm_Q8 | 20.785 | 0.726 | 0.813 | 0.888 |
| ICTS_in Comm_Pharm_Q9 | 21.565 | 0.592 | 0.433 | 0.895 |
| ICTS_in Comm_Pharm_Q10 | 19.575 | 0.653 | 0.594 | 0.893 |

##

## **Appendix III**

## **Reliability Test for ICT Quality Attributes**

**Appendix Table 5: Results of Reliability Test for ICT Quality Attributes**

| Items | Scale Variance if Item Deleted | Corrected Item–Total Correlation | Cronbach's Alpha if Item Deleted |
| --- | --- | --- | --- |
| Attribute_Reliability_Q1 | 2148.368 | 0.824 | 0.992 |
| Attribute_Reliability_Q2 | 2147.974 | 0.829 | 0.992 |
| Attribute_Reliability_Q3 | 2131.692 | 0.875 | 0.992 |
| Attribute_Reliability_Q4 | 2141.030 | 0.802 | 0.992 |
| Attribute_Reliability_Q5 | 2147.324 | 0.876 | 0.992 |
| Attribute_Attitudes_Q6 | 2131.658 | 0.951 | 0.992 |
| Attribute_Attitudes_Q7 | 2154.278 | 0.848 | 0.992 |
| Attribute_Attitudes_Q8 | 2138.467 | 0.925 | 0.992 |
| Attribute_Attitudes_Q9 | 2147.778 | 0.873 | 0.992 |
| Attribute_Skill_Professional_Q10 | 2147.886 | 0.916 | 0.992 |
| Attribute_Skill_Professional_Q11 | 2151.269 | 0.877 | 0.992 |
| Attribute_Skill_Professional_Q12 | 2134.881 | 0.867 | 0.992 |
| Attribute_ICT_Service_Marketing_Q13 | 2141.886 | 0.936 | 0.992 |
| Attribute_ICT_Service_Marketing_Q14 | 2179.398 | 0.803 | 0.992 |
| Attribute_Information_Supply_Q15 | 2140.836 | 0.877 | 0.992 |
| Attribute_Information_Supply_Q16 | 2147.099 | 0.918 | 0.992 |
| Attribute_Information_Supply_Q17 | 2134.806 | 0.950 | 0.992 |
| Attribute_Information_Supply_Q18 | 2139.952 | 0.916 | 0.992 |
| Attribute_Responsive_Q19 | 2132.935 | 0.962 | 0.992 |
| Attribute_Responsive_Q20 | 2138.806 | 0.973 | 0.992 |
| Attribute_Responsive_Q21 | 2124.369 | 0.962 | 0.992 |
| Attribute_Responsive_Q22 | 2147.997 | 0.905 | 0.992 |
| Attribute_Technology_Usage_Q23 | 2137.658 | 0.940 | 0.992 |
| Attribute_Technology_Usage_Q24 | 2122.075 | 0.924 | 0.992 |
| Attribute_Technology_Usage_Q25 | 2122.356 | 0.950 | 0.992 |
| Attribute_Technology_Usage_Q26 | 2151.608 | 0.880 | 0.992 |
| Attribute_Proactive_Q27 | 2141.435 | 0.954 | 0.992 |
| Attribute_Proactive_Q28 | 2135.530 | 0.899 | 0.992 |
| Attribute_Proactive_Q29 | 2137.821 | 0.971 | 0.992 |
| Attribute_Proactive_Q30 | 2166.188 | 0.801 | 0.992 |
| Attribute_Training_ICT_Providers_Q31 | 2168.638 | 0.832 | 0.992 |
